# Supplementary material for: Solid-State Formation of a Potential Melphalan Delivery Nanosystem Based on β-Cyclodextrin and Silver Nanoparticles
Source: MDPI journal article supplement (doi:10.3390/ijms24043990), 2023-02-16
Supplement: s1 [file s1]

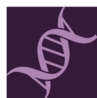

Supporting Information

# Solid-state formation of a potential Melphalan delivery nanosystem based on $\beta$ -cyclodextrin and silver nanoparticles.

Rodrigo Sierpe <sup>1,2,3</sup>, Orlando Donoso-González <sup>1,2,4,5</sup>, Erika Lang <sup>1</sup>, Michael Noyong <sup>5</sup>, Ulrich Simon <sup>5</sup>, Marcelo J. Kogan <sup>2,4,\*</sup> and Nicolás Yutronic <sup>1,\*</sup>

<sup>1</sup> Departamento de Química, Facultad de Ciencias, Universidad de Chile, Las Palmeras #3425, Ñuñoa, Santiago, Chile

<sup>2</sup> Departamento de Química Farmacológica y Toxicológica, Facultad de Ciencias Químicas y Farmacéuticas, Universidad de Chile, Sergio Livingstone #1007, Independencia, Santiago, Chile

<sup>3</sup> Departamento de Química, Facultad de Ciencias Naturales, Matemática y del Medio Ambiente, Universidad Tecnológica Metropolitana (UTEM), Las Palmeras 3360, Ñuñoa, 7800003 Santiago, Chile

<sup>4</sup> Advanced Center for Chronic Diseases (ACCDiS), Sergio Livingstone #1007, Independencia, Santiago, Chile

<sup>5</sup> RWTH Aachen University, Institute of Inorganic Chemistry, Landoltweg 1a, D-52074 Aachen, Germany

\* Correspondence: nyutronic@uchile.cl (N.Y.), mkogan@ciq.uchile.cl (M.K.)

**Citation:** To be added by editorial staff during production.

Academic Editor: Firstname Last-name

Received: date

Revised: date

Accepted: date

Published: date

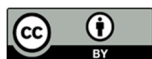

**Copyright:** © 2023 by the authors.

Submitted for possible open access publication under the terms and conditions of the Creative Commons Attribution (CC BY) license (<https://creativecommons.org/licenses/by/4.0/>).

### S1. Stoichiometric ratio of the inclusion complex

The stoichiometric ratios were calculated in the  $^1\text{H}$ -NMR spectra by comparing the integrals of the Mel protons with the integrals of the  $\beta\text{CD}$  protons from the  $\beta\text{CD}$ -Mel systems. First, the integrals of the Mel signals (protons H'2'/6' and H'3/5') were analyzed using the H1 signal of  $\beta\text{CD}$  as reference, which integrated for 7 as it is possible to observe in figure S1. The stoichiometric ratios calculated are summarized in Table S1. The calculated stoichiometric ratio was 1:1.

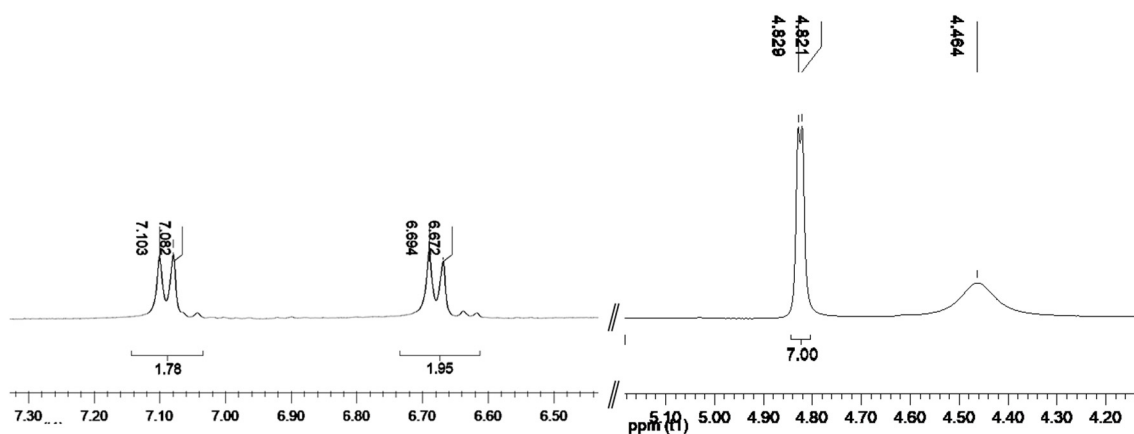

**Figure S1.** Signal integration of  $^1\text{H}$ -NMR spectra of  $\beta\text{CD}$ -Mel in  $\text{DMSO-d}_6$ .

**Table S1.** Values of the integrated Mel and  $\beta\text{CD}$  proton signals in the  $^1\text{H}$ -NMR spectra of the  $\beta\text{CD}$ -Mel system, with the integrated H1 proton signals of  $\beta\text{CD}$  as a reference.

| Proton signal | Reference | Integral | Counts | Ratios |
|---------------|-----------|----------|--------|--------|
| H1            | 7         | 7        | 1      | 1      |
| H'2'/6'       | 2         | 1.78     | 0.89   | 1      |
| H'3/5'        | 2         | 1.95     | 0.98   | 1      |

## S2. Determination of association constants of inclusion complex

To perform the quantification of Mel, a calibration curve was made with stocks of aqueous solutions of known concentrations according to the absorbance maxima at 301 nm, to obtain the value of  $\epsilon$  of Beer-Lambert law. Figure S2 shows the UV-vis spectra of known concentrations of aqueous Mel solutions.

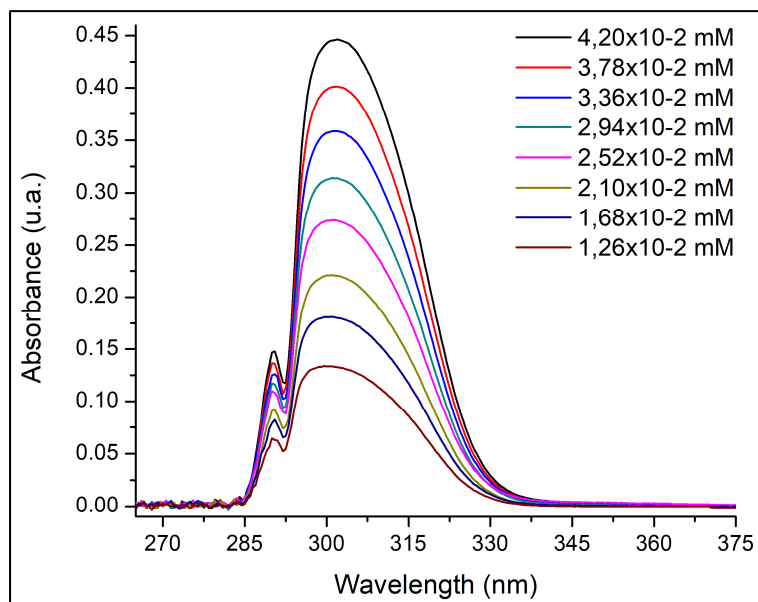

**Figure S2.** UV-vis spectra of different concentrations of aqueous Mel solutions.

The absorbance maxima of the UV-vis spectra at 301 nm and the concentration of the Mel solution were attached in Table S2.

**Table S2.** Data on the concentrations of the drug and its absorbance maxima at 301 nm, respectively.

| [Mel] (mmol/L) | Absorbance (a.u.) |
|----------------|-------------------|
| 0.0420         | 0.4452            |
| 0.0378         | 0.4010            |
| 0.0336         | 0.3585            |
| 0.0294         | 0.3143            |
| 0.0252         | 0.2738            |
| 0.0210         | 0.2212            |
| 0.0168         | 0.1811            |
| 0.0126         | 0.1335            |

By plotting the Mel concentration versus the maximum absorbance at 301 nm, the line shown in Figure S3 was obtained. The linear range with an R-square of 0.99993 indicates a correct fit. The value of  $\epsilon$  was  $10.6534 \pm 0.0324 \text{ mM}^{-1}\text{cm}^{-1}$ .

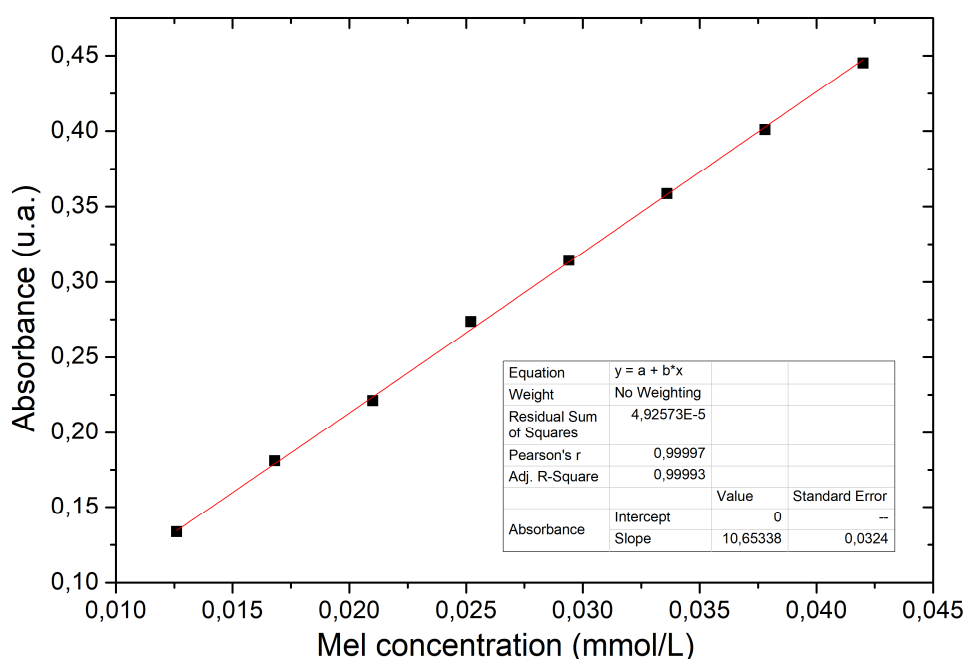

**Figure S3.** Linear plots of the Mel absorbance maxima at 301 nm vs. concentrations.

For the determination of the  $K_a$  values, a stock solution was prepared with 200 mg of  $\beta$ CD and water in a 25 mL measuring flask. Volumes of 0 to 2 mL of the stock were taken and diluted with water to produce a total volume of 2 mL with a fixed amount of the drug, 5.0 mg of Mel was added. All the data obtained are presented in Table S3. By applying the extinction coefficient value  $\epsilon$  to equation 1, it was possible to determine Mel concentrations present in the different assays using the Higuchi-Cornors model.

**Table S3.** Values of the tests made to calculate the  $K_a$  and CE of the  $\beta$ CD-Mel system in water.

| [ $\beta$ CD]<br>(mmol/L) | Absorbance<br>(a.u.) | [Mel]<br>(mmol/L) |
|---------------------------|----------------------|-------------------|
| 0                         | 0.5871               | 0.05511           |
| 0.0440                    | 0.5988               | 0.05621           |
| 0.0881                    | 0.6271               | 0.05886           |
| 0.1760                    | 0.6691               | 0.06281           |
| 0.2200                    | 0.6712               | 0.06300           |
| 0.2643                    | 0.6772               | 0.06357           |
| 0.3524                    | 0.7305               | 0.06857           |
| 0.4400                    | 0.7359               | 0.06908           |

The linear relationship obtained from a plot of the solubilized Mel concentration versus the added  $\beta$ CD concentration is shown in Figure S4. The value of the slope was 0.0334 ( $\pm 0.0026$ ). Using equation 1, the association constant  $K_a$  was calculated, resulting in a value of 625  $M^{-1}$ . Finally, using equation 2, the value of complexation efficiency (CE) was calculated, resulting in a value of 0.035 for the  $\beta$ CD-Mel system.

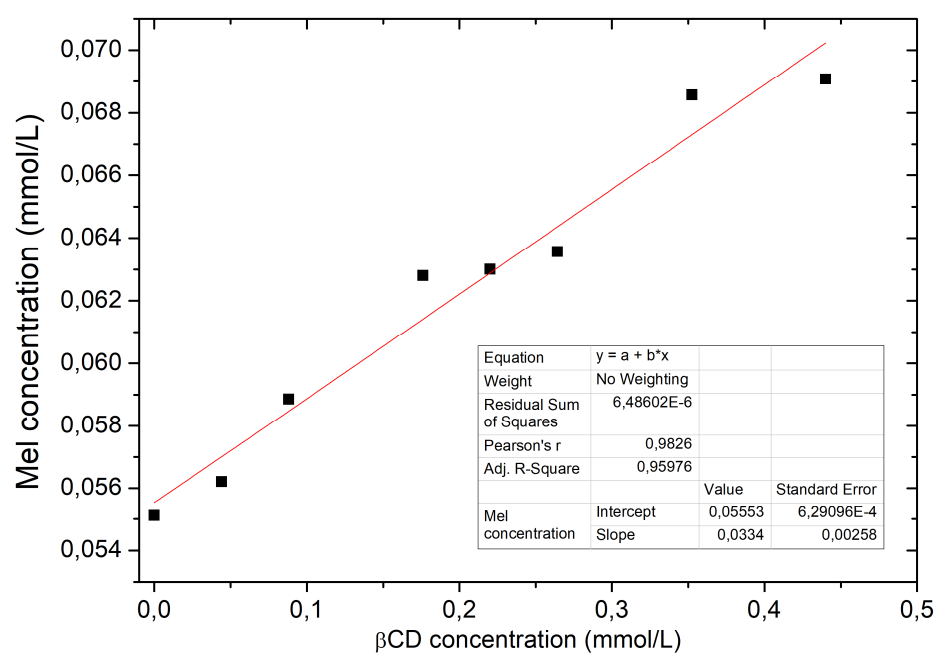

**Figure S4.** Graph of the concentration of solubilized Mel versus the concentration of added  $\beta$ CD and the linear fit.

### S3. Full ROESY spectra of the inclusion complex

Figure S5 shows the complete ROESY spectrum of the  $\beta$ CD-Mel system, from which the zooms made for Figure 5a and 5b were then obtained.

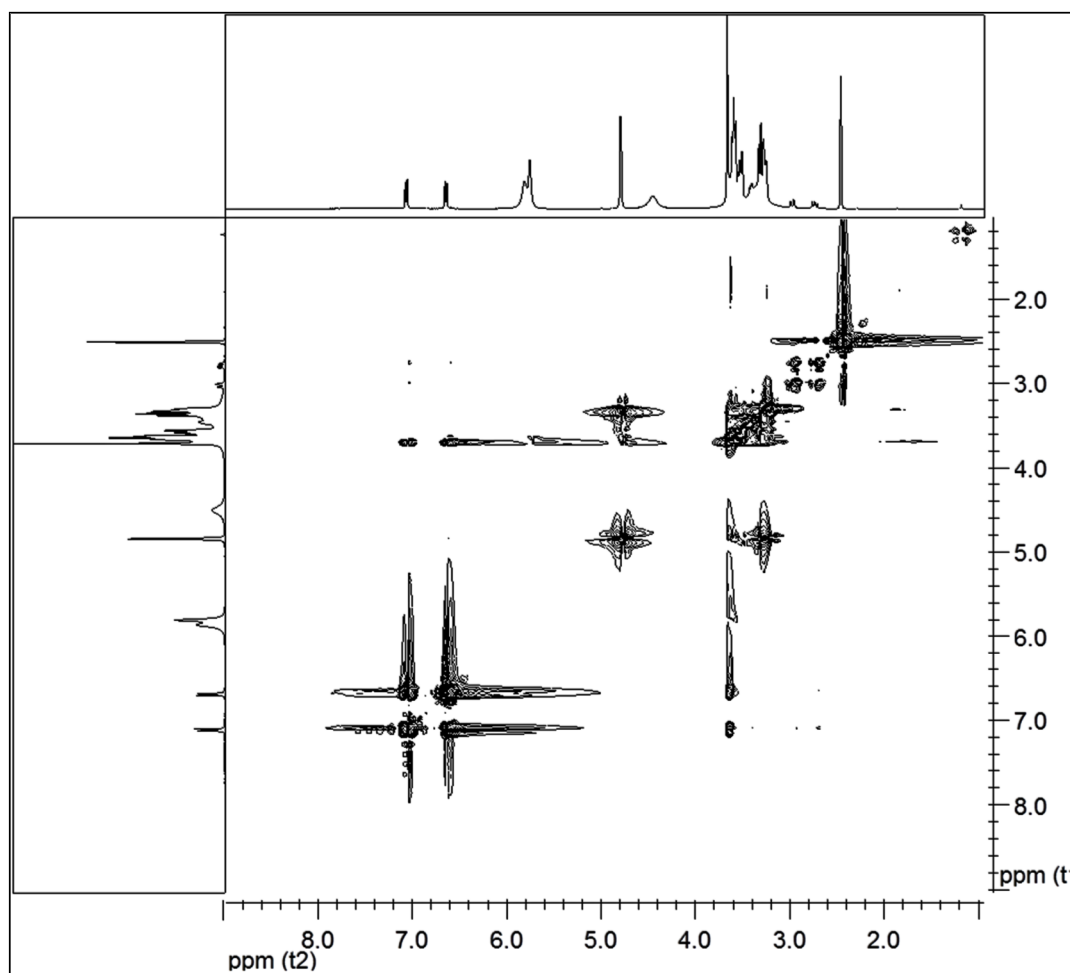

Figure S5. Full ROESY spectra of  $\beta$ CD-Mel complex in DMSO- $d_6$ .

#### S4. UV-vis spectra of melphalan in solid state

Figure S6 shows UV-vis spectra of Mel in solid state.

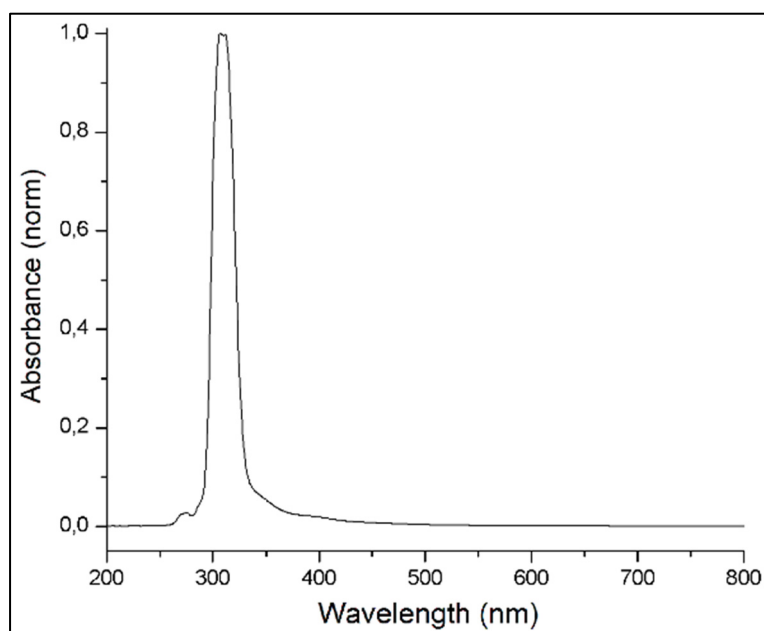

**Figure S6.** UV-vis spectra of Mel in solid state.

### S5. More FE-SEM and EDX of inclusion complex with silver nanoparticles

Figure S7 shows FE-SEM micrographs of  $\beta$ CD-Mel crystals covered with AgNPs.

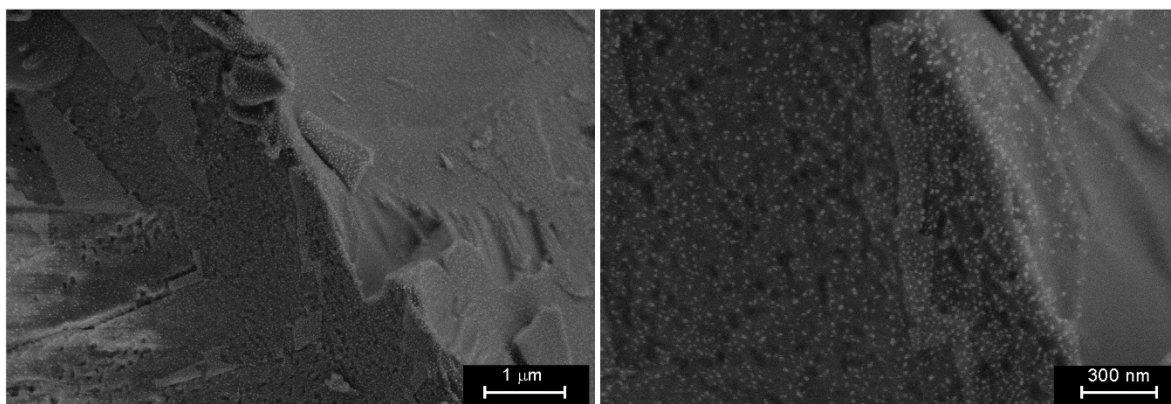

**Figure S7.** FE-SEM micrograph of  $\beta$ CD-Mel with AgNPs, the time of exposure in sputtering was 32 s.

The data collected from the different EDX spectra were summarized in Table S4.

**Table S4.** Average percentage of each element in sections from FE-SEM images.

| Element      | Average weight (%) |
|--------------|--------------------|
| C K          | 53.2 $\pm$ 6.4     |
| O K          | 46.3 $\pm$ 6.5     |
| Cl K         | 0.19 $\pm$ 0.09    |
| Ag L         | 0.29 $\pm$ 0.05    |
| <b>Total</b> | <b>100,000</b>     |



### S6. SEM of $\beta$ -cyclodextrin, melphalan, and inclusion complex

Figure S8 shows SEM micrographs of (A)  $\beta$ CD, (B) Mel and (C)  $\beta$ CD-Mel crystals, which were previously covered with silver atoms to improve their conductivity.

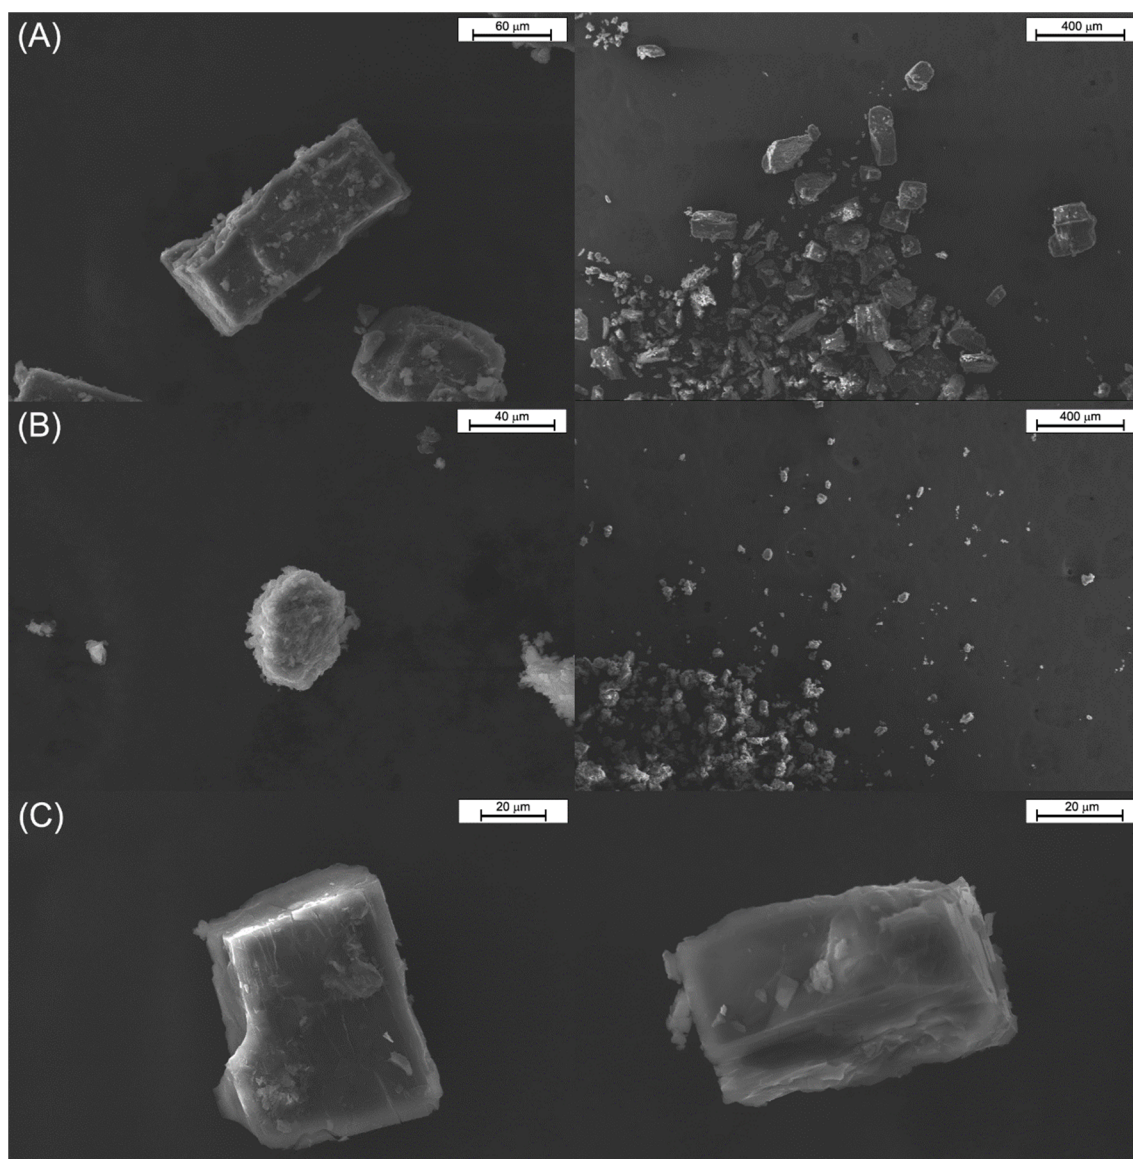

**Figure S8.** SEM micrographs of (A)  $\beta$ CD, (B) Mel and (C)  $\beta$ CD-Mel crystals.

### S7. Parallel artificial membrane permeability assay methods and analysis

PAMPA was performed in triplicate ( $n = 3$ ), with each  $n$  representing an average of three assays performed on the same plate. Table S5 shows the absorbance values, calculated concentrations and effective permeabilities of the evaluated systems: Mel,  $\beta$ CD-Mel,  $\beta$ CD-Mel-AgNPs.

**Table S5.** Absorbances, concentrations and effective permeabilities obtained via PAMPA.

| System               | Absorbance (a.u.) | Concentration ( $\mu\text{mol/mL}$ ) | Effective permeability (cm/s) |
|----------------------|-------------------|--------------------------------------|-------------------------------|
| Mel                  | 0.07              | 0.0070                               | $1.044 \times 10^{-7}$        |
|                      | 0.159             | 0.0159                               | $2.412 \times 10^{-7}$        |
|                      | 0.124             | 0.0124                               | $1.869 \times 10^{-7}$        |
| $\beta$ CD-Mel       | 0.666             | 0.0665                               | $1.241 \times 10^{-5}$        |
|                      | 0.592             | 0.0591                               | $7.508 \times 10^{-6}$        |
|                      | 0.536             | 0.0535                               | $5.807 \times 10^{-6}$        |
| $\beta$ CD-Mel-AgNPs | 0.151             | 0.0151                               | $9.660 \times 10^{-7}$        |
|                      | 0.194             | 0.0194                               | $1.291 \times 10^{-6}$        |
|                      | 0.116             | 0.0116                               | $7.202 \times 10^{-7}$        |

**Disclaimer/Publisher's Note:** The statements, opinions and data contained in all publications are solely those of the individual author(s) and contributor(s) and not of MDPI and/or the editor(s). MDPI and/or the editor(s) disclaim responsibility for any injury to people or property resulting from any ideas, methods, instructions or products referred to in the content.
